# Supplementary figures and images for: Microporous hybrid compounds: hydrothermal synthesis and characterization of two zinciomethylenediphosphonates with 3D structures, structure determination of their dehydrated formsElectronic supplementary information (ESI): final Rietveld plots for MIL-48calc and VSB-4(Zn). See http://www.rsc.org/suppdata/jm/b1/b108301p
Source: Royal Society of Chemistry journal article supplement (doi:10.1039/b108301p), 2002-02-19

MIL48c

Intensity (a.u.)

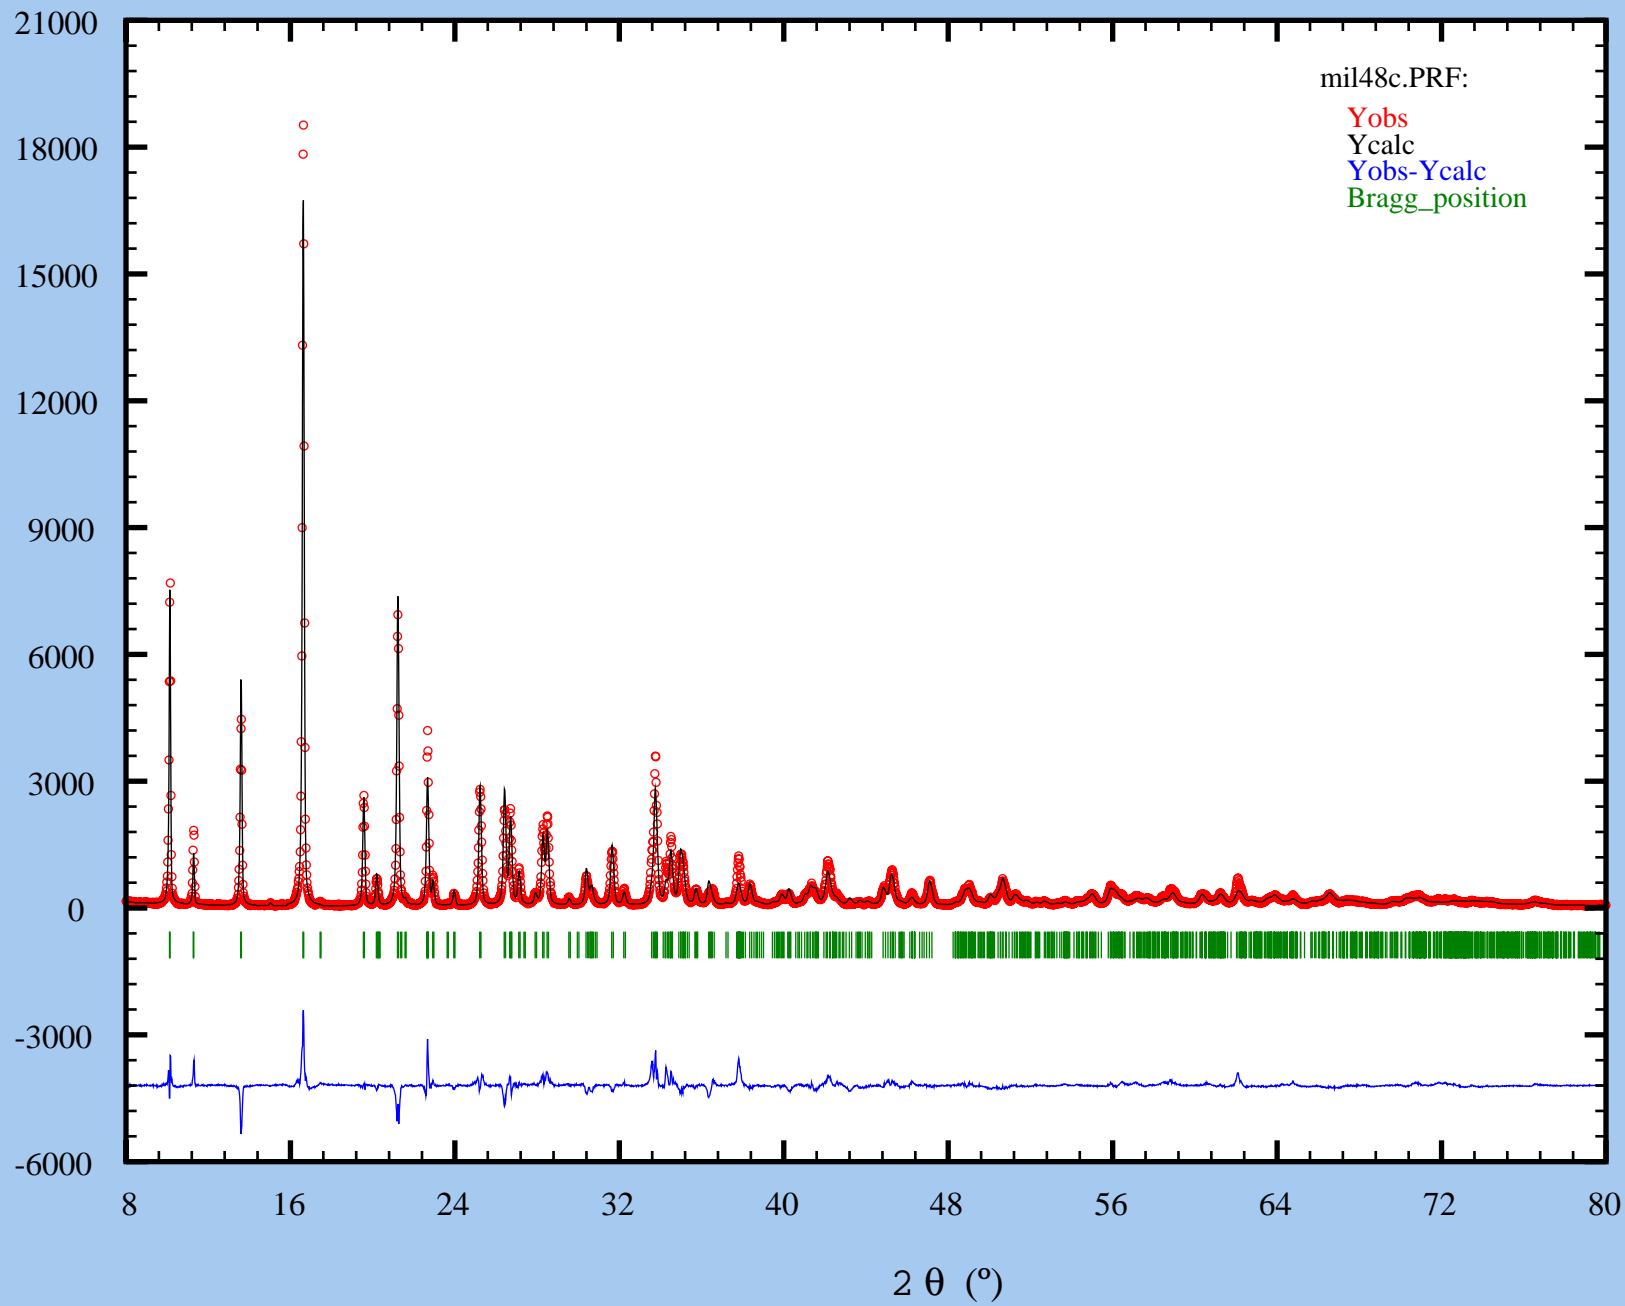

Supplement: b108301p.pdf [file b108301p.pdf]
